# Supplementary material for: Crotonis Fructus Extract Inhibits 12-O-Tetradecanoylphorbol-13-Acetate-Induced Expression of Matrix Metalloproteinase-9 via the Activator Protein-1 Pathway in MCF-7 Cells
Source: PubMed Central journal article supplement — J Breast Cancer. 2017 Sep 22;20(3):234–9. doi: 10.4048/jbc.2017.20.3.234 (PMC5620437; doi:10.4048/jbc.2017.20.3.234), 2017-09-22
Supplement: jbc-20-234-s001.pdf [file jbc-20-234-s001.pdf]

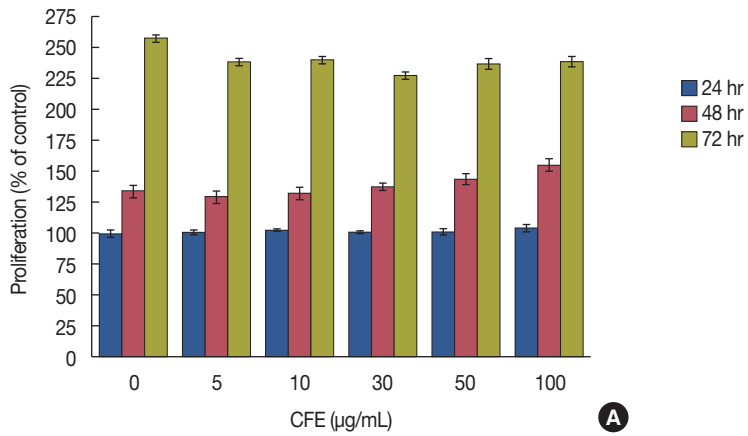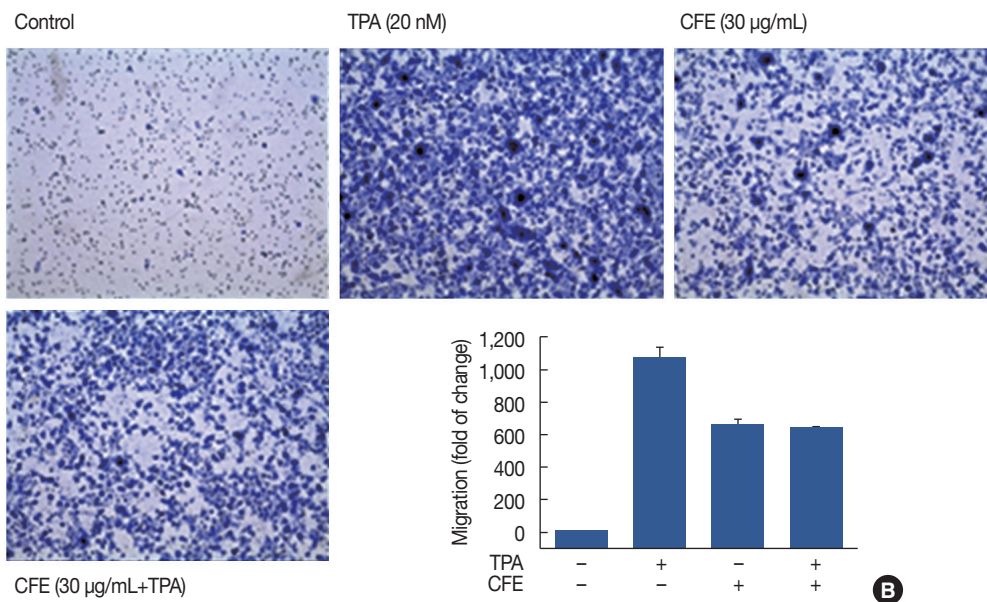

**Supplementary Figure 1.** CFE inhibits TPA-induced Migration in MCF-7 cells. (A) Cells were treated with various concentrations of CFE for each time. Cells were detected by EZ-cytox viability assay kit. (B) Cells were seeded in the upper chamber of chamber dishes and were either treated with CFE or untreated. After 24 hours, invasion cells were counted after staining. CFE = *crotonis fructus* extract; TPA = 12-O-tetradecanoylphorbol-13-acetate.
