# Supplementary material for: Crotonis Fructus Extract Inhibits 12-O-Tetradecanoylphorbol-13-Acetate-Induced Expression of Matrix Metalloproteinase-9 via the Activator Protein-1 Pathway in MCF-7 Cells
Source: PubMed Central journal article supplement — J Breast Cancer. 2017 Sep 22;20(3):234–9. doi: 10.4048/jbc.2017.20.3.234 (PMC5620437; doi:10.4048/jbc.2017.20.3.234), 2017-09-22
Supplement: jbc-20-234-s002.pdf [file jbc-20-234-s002.pdf]

Effects of *Crotonis Fructus* Extract on Breast Cancer Cell Invasion

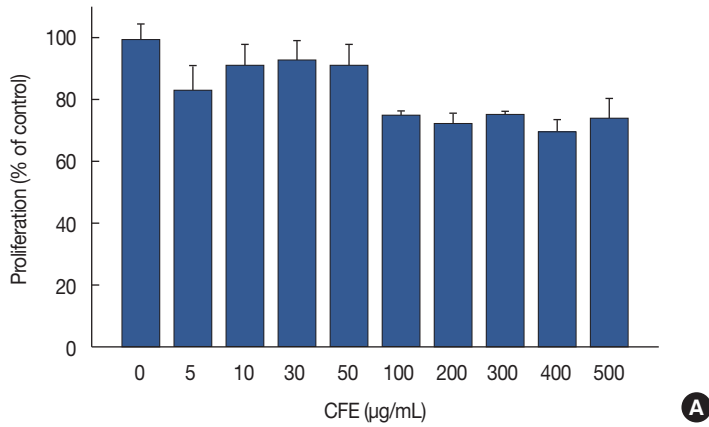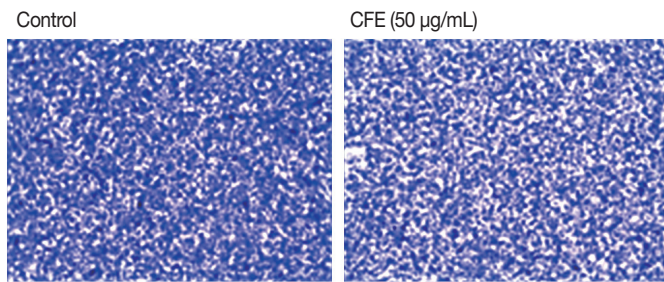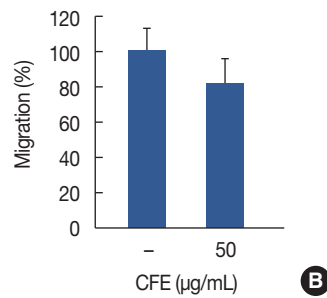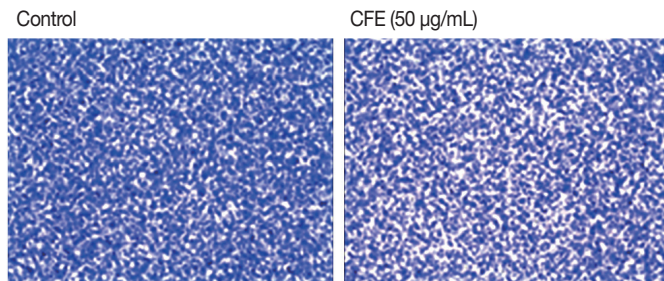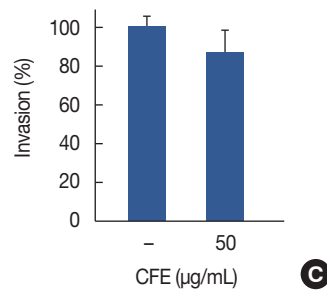

**Supplementary Figure 2.** CFE inhibits migration and Matrigel invasion in MDA-MB-231 cells. (A) CFE were treated with indicated concentrations for 24 hours and then assayed using with EZ-cytox cell viability assay kit. To confirm the (B) migration, and (C) Matrigel invasion in MDA-MB-231 cells, cells were seeded in the upper chamber of chamber dishes and were treated with CFE. CFE = *crotonis fructus* extract.
